# Supplementary material
Source: Research Square preprint supplement (doi:10.21203/rs.3.rs-10201661/v1)
Supplement: Supplementary file 1 [file dbb7f85ba33733bd1a58ceb2.docx]

**Standardized Survey Questionnaire**

Good morning/afternoon.

My name is **Gaston KISULU KINYEMA**. I am a researcher and a student in the first cohort of the Master’s program in Epidemiology and Biostatistics at the Evangelical University in Africa **(UEA)**.

I am currently conducting a scientific study entitled: *'Factors associated with the cholera epidemic in the Shabunda Rural Health Zone: A Case-Control Study'*. The purpose of this research is to identify the environmental, socio-economic, and behavioral factors that contributed to the 2023 cholera outbreak to help health authorities better protect our community in the future.

Your participation in this study is entirely voluntary. All your responses will remain strictly confidential and will be used solely for academic and scientific research purposes. You have the right to refuse to answer any specific question or to end the interview at any time without any penalty or negative consequences. This survey will take approximately 15 to 20 minutes of your time.

**Do you freely consent to participate in this study and answer my questions?**

- [ ] **Yes** (Proceed to Section I: Respondent Identity)
- [ ] **No** (Thank the individual for their time and end the interview)

| **N°** | **Variable** | **Options / Coaching** | **Code** |
| --- | --- | --- | --- |
| ***I. Respondent Identity (Socio-demographic characteristics)*** | | | |
| 01 | Subject Group | a) Case  b) Control | 1  0 |
| 02 | Epidemiological Week | Number : |  |
| 03 | Gender | a) Male  b) Female | 0  1 |
| 04 | Age | Number (in years): |  |
| 05 | Household Size | a) 1 to 3 people  b) 4 to 6 people  c) 7 or more people | 0  1  2 |
| 06 | Occupation | a) Unemployed  b) Housewife  c) Farmer  d) Miner  e) Student  f) Civil servant  g) Military | 6  7  0  1  3  5  4 |
| 07 | Education Level | a) Primary  b) Secondary  c) University | 0  1  2 |
| 08 | Health Area of Origin | a) Dima, b) Lupimbi, c) Mankulu, d) Mbangayo, e) Nyalubwe | 0, 1, 2, 3, 4 |
| 09 | Specific Neighborhood / Avenue | [List of 28 locations including Kitete, Mbusu, Matalatala, Kese, etc.] | 0 to 27 |
| ***II. Environmental Factors*** | | | |
| 10 | Walking time to reach water source | a) Less than 10 minutes  b) More than 10 minutes | 0  1 |
| 11 | Water source used for laundry | a) Ulindi River  b) Protected water sources  c) Unprotected sources | 0  1  2 |
| 12 | Main source of drinking water | a) Ulindi River water  b) Kebole water supply  c) Protected spring water | 0  1  2 |
| 13 | Presence of "Buch" (Mining sites/camps) in the area | a) Yes  b) No | 0  1 |
| ***III. Behavioral Factors*** | | | |
| 14 | Presence and use of handwashing kit | a) Yes  b) No | 0  1 |
| 15 | Drinking water treatment | a) Yes  b) No | 0  1 |
| 16 | Cleaning food before cooking or consumption | a) Yes  b) No | 0  1 |
| ***IV. Socio-economic Factors*** | | | |
| 17 | Hosting visitors/family from mining areas during the epidemic | a) Yes  b) No | 0  1 |
| 18 | Distance to reach the treatment center (health facility) | a) Less than 1 km  b) More than 1 km | 0  1 |
